# Supplementary material for: Computational fluid dynamics (CFD) using porous media modeling predicts recurrence after coiling of cerebral aneurysms
Source: PLoS One. 2017 Dec 28;12(12):e0190222. doi: 10.1371/journal.pone.0190222 (PMC5746265; doi:10.1371/journal.pone.0190222)
Supplement: S1 File — (XLSX) [file pone.0190222.s001.xlsx]

## Sheet: Sheet1
Group	age	sex	Angio f/u	AN Location		AN Location	coil	coil	AN volume	Bare coil v	Bare VER	Hydro coil v	Hydro VER	coil length(mm)	Ave Bare CD(m)	Ave. Hydro CD(m)	CAG immediate	CAGf/u	DSA_result		Maximum Size	Neck Width	Dome Volume	Dome Area	Neck Area	VOR			WSS	NWSS	SP	SSR	LWSS	LSA	LSAR	Abosolute helicity	Lambda 2	Invariant Q	Swirling discriminant	Stretched swirling strength	Swirling vector	IFA	OFA	FV@IFA	FV@OFA	SP@IFA	SP@OFA	NPL	NPLC
stable	71	F	12	ICA without	ICA	SW	Hydro	2nd Hydro	246.7	73.9	29.9554	79	32.0227	870	0.000328948	0.00034011	CO	CO	CO		11.36	4.03	246.7	196.3	9.346	0.02639			0.2297	0.01979	616.6	45.74	1.161	0.0001843	0.9388	0.05618	104.8	-134.3	-389600000	0.1446	0.2233	223300	223300000000	0.1146	0.05991	670.3	557.5	117.8	16.99
stable	66	F	12	Acom	Acom	BT	Bare	Bare	39.17	17.2	43.9112	17.2	43.9112	260	0.000290297	0.000290297	CO	CO	CO		6.29	2.53	39.17	60.11	5.432	0.00721			0.06816	0.01471	303.8	11.14	0.4632	5.483e-05	0.9121	0.001927	7.365	-10.7	-148000	0.02007	0.04192	41920	41920000000	0.1299	0.09037	316	298.1	22.57	2.535
stable	66	M	6	ICB	ICA	BT	Bare	Bare	315.2	70.9	22.4937	70.9	22.4937	1400	0.000253994	0.000253994	NR	CO	CO		10.64	5.39	315.2	217.5	19.64	0.01605			0.1383	0.03877	246.6	31.71	0.3567	0.0002145	0.9864	0.005786	53.73	-68.01	-56490000	0.0259	0.04126	41260	41260000000	0.05577	0.03136	265.3	225.8	40.66	24.76
stable	58	F	12	ICA without	ICA	SW	Hydro	2nd Hydro	54.8	19.7	35.9489	21.2	38.6861	270	0.000304871	0.000316265	NR	CO	CO		7.51	2.46	54.8	73.87	4.904	0.01117			0.1827	0.01549	718.3	32.24	1.179	7.012e-05	0.9492	0.02319	80.67	-97.21	75150000	0.1071	0.167	167000	167000000000	0.04743	0.03296	741.7	681.1	61.2	51.53
stable	59	M	12	ICB	ICA	BT	Matrix	Matrix	28.66	6.8	23.7264	8.1	28.2624	140	0.000248746	0.000271484	CO	CO	CO		5.63	2.43	28.66	48.1	4.456	0.006432			0.2582	0.06894	278.4	54.16	0.3745	4.5e-05	0.9354	0.03567	352	-519.4	-6986000000	0.2113	0.3735	373500	373500000000	0.08313	0.03413	301.6	258.5	46.13	12.64
stable	52	M	6	ICA without	ICA	SW	Matrix	Matrix	68.52	12.7	18.5347	17.5	25.54	280	0.000240374	0.000282166	NR	CO	CO		6.67	3.86	68.52	78.63	9.781	0.007005			0.1976	0.0433	273.4	43.3	0.4564	7.592e-05	0.9654	0.0287	87.53	-109.6	10200000	0.1553	0.2433	243300	243300000000	0.1274	0.1248	288.9	258.3	30.93	3.609
stable	71	F	7	ICPC	ICA	SW	Hydro	1st Hydro	133.6	36.4	27.2455	80.3	60.1048	490	0.000307622	0.000456904	CO	CO	CO		8.37	6.7	133.6	114.5	25.57	0.005226			0.3246	0.0211	628.4	32.28	1.539	0.0001055	0.921	0.005905	39.06	-49.88	-4756000	0.04882	0.08058	80580	80580000000	0.5541	0.4391	692.3	623.8	128.8	0.7946
stable	71	F	6	ICPC	ICA	SW	Hydro	1st Hydro	1191	228.8	19.2107	746.5	62.6784	2680	0.000329781	0.00059568	CO	CO	CO		18.81	5.97	1191	567.6	24.62	0.04838			0.03315	0.003449	314	3.043	0.9609	0.0005665	0.9981	0.0001183	0.4486	-0.619	-179400	0.003646	0.004922	4922	4922000000	0.006547	0.006258	322.3	305.2	17.15	757.8
stable	54	F	12	ICA without	ICA	SW	Bare	Bare	35.38	8.9	25.1555	11.8	33.3522	200	0.000238092	0.000274152	NR	CO	CO		4.27	3.02	35.38	48.9	5.21	0.00679			0.2208	0.0244	596.4	42.93	0.9048	4.713e-05	0.9555	0.03018	95.78	-117.6	-68210000	0.1532	0.2552	255200	2.552e+11	0.03745	0.03056	614.9	575.1	40	54.02
stable	61	F	12	ICB	ICA	BT	Bare	Bare	27.69	5.5	19.8628	6.2	22.3908	110	0.000252377	0.000267957	BF	CO	CO		4.47	3.49	27.69	41.85	6.289	0.004403			3.185	0.181	658.9	702.9	1.76	1.202e-05	0.2872	3.343	10710	-14670	-5697000000000	4.357	6.339	6339000	6339000000000	0.3986	0.2265	774.8	456.8	374.8	4.467
stable	63	F	6	ICAch	ICA	SW	Bare	Bare	27.78	6.9	24.838	6.9	24.838	105	0.000289331	0.000289331	BF	CO	CO		4.22	2.54	27.78	43.15	4.195	0.006623			0.5022	0.04262	168.4	111.4	1.178	3.793e-05	0.8791	0.5805	1405	-1633	-1872000000000	0.7862	1.217	1217000	1217000000000	0.2123	0.05816	213.3	145.4	89.86	3.776
stable	64	F	12	ICA without	ICA	SW	Matrix	Matrix	58.81	12.4	21.0848	16.2	27.5463	270	0.000241877	0.000276465	CO	CO	CO		5.59	4.2	58.81	68.03	9.919	0.005929			0.1963	0.03215	753	41.58	0.6105	6.578e-05	0.967	0.01738	68.1	-92.3	-23850000	0.1624	0.253	253000	253000000000	0.1213	0.1012	768.7	738.6	32.44	4.173
stable	67	F	12	ICPC	ICA	SW	Bare	Bare	39.3	13.9	35.369	13.9	35.369	230	0.000277465	0.000277465	NR	CO	CO		5.59	4.07	39.3	52.52	10.93	0.003595			1.157	0.0678	1042	218.5	1.707	3.674e-05	0.6995	0.5899	1754	-2807	3314000000	0.8224	1.214	1214000	1214000000000	0.5594	0.398	1173	992.4	262	1.586
stable	70	M	12	VAPICA	Posterior	SW	Matrix	Matrix	22.16	4.5	20.3069	5.7	25.722	100	0.000239426	0.000269465	CO	CO	CO		4.21	2.68	22.16	35.83	4.805	0.004612			0.05581	0.007396	1072	12.41	0.7546	3.554e-05	0.9918	0.005321	89.04	-150.3	-5127000000	0.04556	0.07003	70030	70030000000	0.05081	0.006025	1079	1070	9.983	7.323
stable	52	F	6	ICA without	ICA	SW	Matrix	Matrix	41.49	10.1	24.3432	12.3	29.6457	210	0.000247523	0.000273154	BF	CO	CO		5.53	3.54	41.49	58.73	8.122	0.005109			0.1772	0.02987	390.2	37.04	0.5933	5.558e-05	0.9463	0.02181	45.26	-60.4	-1278000	0.218	0.315	315000	315000000000	0.1238	0.1337	404.4	378.4	24.72	3.053
stable	62	M	6	ICPC	ICA	SW	Matrix	Matrix	36.44	11.3	31.0099	13	35.6751	230	0.000250173	0.000268332	NR	CO	CO		4.26	3.16	36.44	48.95	6.428	0.005669			0.8511	0.05922	1162	160.7	1.437	3.799e-05	0.7761	0.1467	1987	-2698	-4632000000000	0.4269	0.6606	660600	660600000000	0.1649	0.07704	1244	1097	158.7	11.06
stable	65	F	6	ICA without	ICA	SW	Bare	Bare	27	8.2	30.3704	8.2	30.3704	170	0.000247884	0.000247884	CO	CO	CO		4.11	3.86	27	36.94	11.11	0.002431			0.3218	0.06554	321.4	65.93	0.491	3.53e-05	0.9557	0.0452	108.4	-152.4	148700000	0.4328	0.5868	586800	586800000000	0.03898	0.021	336.7	307.3	29.94	37.31
stable	63	M	12	BAB	Posterior	BT	Hydro	1st Hydro	91.12	29.9	32.8139	32.7	35.8867	410	0.000304796	0.000318748	NR	CO	CO		6.42	4.04	91.12	91.59	12.18	0.007479			0.09447	0.05255	101.7	17.59	0.1797	9.129e-05	0.9967	0.001719	10.21	-14.95	783400	0.02974	0.04695	46950	46950000000	0.01576	0.01024	112.7	93.95	18.8	143.2
stable	56	M	6	BASCA	Posterior	SW	Bare	Bare	8.891	4.1	46.114	4.1	46.114	80	0.000255512	0.000255512	BF	CO	CO		3.04	1.8	8.891	18.66	3.913	0.002272			0.03751	0.01317	125.5	5.837	0.2848	1.866e-05	1	0.0004701	2.053	-3.897	-1899	0.02511	0.04295	42950	42950000000	0.04601	0.03353	128.6	123.8	5.411	4.842
stable	52	F	12	ICA without	ICA	SW	Matrix	Matrix	99.58	18.1	18.1763	25.2	25.3063	390	0.000243149	0.000286902	BF	NR improvement	NR		6.66	5.88	99.58	90.32	21.52	0.004628			0.6976	0.11	443.6	153.2	0.6344	7.233e-05	0.8008	0.1412	186.9	-236	7711000	0.4045	0.5868	586800	586800000000	0.1509	0.1512	486.9	402.7	84.19	7.002
stable	38	F	6	ICA without	ICA	SW	Matrix	Matrix	48.04	6.6	13.7386	8.3	17.2773	120	0.000264695	0.000296834	BF	NR improvement	NR		5.91	3.62	48.04	61.44	8.495	0.005655			0.6146	0.08088	291.3	146.3	0.7599	5.21e-05	0.848	0.6822	982.6	-1196	-75040000000	1.248	1.813	1813000	1813000000000	0.1757	0.0789	322	268.6	66.43	4.077
stable	73	F	6	Acom	Acom	BT	Matrix	Matrix	35.05	9.2	26.2482	12.1	34.5221	200	0.000242072	0.000277615	BF	NR improvement	NR		4.69	3.68	35.05	46.61	8.775	0.003994			0.9475	0.0998	551.1	181.7	0.9495	1.104e-05	0.2368	0.1441	1277	-1588	-55010000000	0.332	0.5869	586900	586900000000	0.3145	0.2355	646.1	482.8	186.3	3.569
stable	60	M	7	Icop	ICA	SW	Matrix	Matrix	78.59	17.9	22.7764	21.7	27.6117	370	0.000248251	0.000273334	NR	NR stable	NR		6.9647	6.5273	78.59	74.29	26.14	0.003007			0.1776	0.03485	373.4	38.56	0.5098	7.298e-05	0.9823	0.02535	130.2	-187.7	-136900000	0.1328	0.2097	209700	209700000000	0.1551	0.09435	383.5	368.5	23.03	1.815
stable	62	M	6	Acom	Acom	BT	Bare	Bare	271.4	76.3	28.1135	76.3	28.1135	1130	0.000293284	0.000293284	NR	NR stable	NR		9.14	7.15	271.4	181.2	35.34	0.00768			0.1065	0.01512	263.7	21.92	0.7048	0.0001613	0.8898	0.02528	190.9	-382.8	-606100000	0.05876	0.07679	76790	76790000000	0.2982	0.1714	300.7	252.2	79.93	1.703
Recurrence	66	F	7	BAB	Posterior	BT	Hydro	2nd Hydro	80.35	29.6	36.8388	31.2	38.8301	390	0.000310942	0.000319235	CO	NR worse+	NR		6.113	5.256	80.35	79.85	16.64	0.004829			0.5035	0.04149	1388	88.06	1.214	7.134e-05	0.8935	0.06656	681.4	-873.4	-1766000000000	0.191	0.3221	322100	322100000000	0.4927	0.3149	1454	1351	178.4	1.392
Recurrence	45	F	6	ICA without	ICA	SW	Bare	Bare	178.3	38.7	21.705	48.6	27.2574	690	0.000267298	0.000299543	CO	NR worse+	NR		8.7595	7.1926	178.3	136	29.33	0.006079			0.4531	0.04579	508.6	96.69	0.9895	0.0001225	0.9005	0.1038	146.1	-206.4	123200000	0.4418	0.5844	584400	584400000000	0.06995	0.03826	545.4	470.3	76.88	29.76
Recurrence	56	F	6	ICA without	ICA	SW	Bare	Bare	48.53	8.8	18.1331	12.2	25.1391	190	0.000242901	0.000286001	NR	NR worse+	NR		4.6765	3.5571	48.53	59.41	7.998	0.006068			0.3032	0.05057	389	66.34	0.5996	5.486e-05	0.9234	0.0475	195	-235.1	-331100000	0.2145	0.321	321000	321000000000	0.1198	0.1414	406	365.9	37.13	4.901
Recurrence	67	F	6	Acom	Acom	BT	Matrix	Matrix	50.18	12.7	25.3089	16.9	33.6788	280	0.000240374	0.000277287	CO	NR worse+	NR		5.82	4.44	50.18	58.34	13.96	0.003595			0.2952	0.05454	150.8	57.42	0.5413	3.958e-05	0.6784	0.02718	76.59	-105.8	113500000	0.255	0.3271	327100	327100000000	0.1737	0.1338	157.8	148.4	15.9	0.9983
Recurrence	85	F	6	ICPC	ICA	SW	Bare	Bare	321.8	56.2	17.4643	56.2	17.4643	995	0.000268239	0.000268239	NR	NR worse+	NR		11.5	4.87	321.8	229.4	15.52	0.02074			0.2224	0.03818	251.8	52.77	0.5825	0.0002163	0.943	0.133	125.9	-138.3	3074000000	0.3159	0.4645	464500	464500000000	0.2078	0.1141	274.9	227.4	63.46	2.783
Recurrence	60	F	12	ICA without	ICA	SW	Bare	Bare	35.77	7.7	21.5264	7.7	21.5264	160	0.0002476	0.0002476	CO	NR worse+	NR		4.93	3.19	35.77	51.83	6.774	0.00528			1.545	0.1171	632.5	348.1	1.32	3.51e-05	0.6773	3.674	4011	-4431	8931000000000	4.223	6.207	6207000	6207000000000	0.4781	0.1971	717.3	559.7	257.7	2.135
Recurrence	70	M	6	Acom	Acom	BT	Bare	Bare	255.4	50.8	19.8904	62	24.2756	880	0.000271179	0.000299585	NR	BF	BF		9.8242	5.1357	255.4	197.9	14.84	0.0172			0.2208	0.03845	373.1	47.27	0.5741	0.0001693	0.8555	0.04415	185.6	-397.5	-815600000	0.19	0.2583	258300	2.583e+11	0.1383	0.05581	398.8	341.3	65.96	6.531
Recurrence	61	F	12	BAB	Posterior	BT	Bare	Bare	511.5	104.2	20.3715	104.2	20.3715	1550	0.00029264	0.00029264	NR	BF	BF		11.744	6.776	511.5	301.2	24.76	0.02066			0.06142	0.03239	117	14.12	0.1897	0.0002978	0.9888	0.004181	18.33	-41.6	83330000	0.05471	0.06708	67080	67080000000	0.1105	0.07328	124.9	111.9	16.59	2.575
Recurrence	76	M	12	MCA	MCA	BT	Bare	Bare	146.7	28.6	19.4956	36.2	24.6762	580	0.000250631	0.000281972	CO	BF	BF		6.9426	5.8367	146.7	127.7	17.33	0.008465			0.5446	0.05698	351	119.8	0.9558	0.0001011	0.7915	0.08267	160	-238.5	731100000	0.5804	0.722	722000	722000000000	0.1588	0.1322	385.7	317.6	72.17	5.417
Recurrence	58	M	12	ICB	ICA	BT	Matrix	Matrix	193.1	25.9	13.4127	35.5	18.3843	570	0.00024059	0.000281671	CO	BF	BF		8.59	5.09	193.1	156.2	19.46	0.009922			0.9664	0.08299	551.1	229.7	1.164	0.0001173	0.7512	0.4835	2171	-3013	-2896000000000	0.637	0.9132	913200	913200000000	0.351	0.1292	621.6	471.4	206.4	3.174
Recurrence	80	F	12	BAB	Posterior	BT	Bare	Bare	887.4	139.7	15.7426	139.7	15.7426	2250	0.000281237	0.000281237	BF	BF	BF		13.53	11.17	887.4	404.1	66.21	0.0134			0.2333	0.0504	365	56.55	0.4629	0.0003946	0.9766	0.05042	156.6	-288	16150000000	0.1346	0.1823	182300	182300000000	0.167	0.06085	390.8	351.6	52	3.531
Recurrence	65	F	6	ICA without	ICA	SW	Bare	Bare	391.3	92.2	23.5625	92.2	23.5625	980	0.000346192	0.000346192	NR	BF	BF		11.58	8.51	391.3	235.5	42.35	0.009242			1.282	0.08997	1672	285.2	1.425	0.000164	0.6961	0.7953	1312	-1373	1854000000	0.5609	0.8007	800700	800700000000	0.2896	0.1039	1821	1550	310	7.001
Recurrence	58	F	6	BAB	Posterior	BT	Matrix	Matrix	2511	327.3	13.0346	327.3	13.0346	4290	0.000311752	0.000311752	BF	BF	BF		8.92	5.45	2511	800.9	153	0.01641			0.1603	0.01503	1470	40.32	1.066	0	0	0.05476	158.7	-217.9	1033000000	0.07745	0.09998	99980	99980000000	0.2354	0.01878	1501	1465	64.87	2.217
[truncated: 103 more columns]
